# Supplementary material for: Combined Effect of Different Flower Stem Features on the Visiting Frequency of the Generalist Ant Lasius niger: An Experimental Study
Source: MDPI journal article supplement (doi:10.3390/insects12111026), 2021-11-14
Supplement: s1 [file s1]

**Table S1.** Number of ant individuals counted on stick samples mimicking different features of the *Smyrnum rotundifolium* flower stem at the time of 31 visits of experimenters during 14 days

IR - intact stick (control)

PR- painted stick (with CaCo<sub>3</sub> coverage)

TH - stick with unpainted, transparent cuffs

PH - stick with painted cuffs (bearing CaCo<sub>3</sub> coverage)

|                        | IR1 | PR1 | TH1 | PH1 | IR2 | PR2 | TH2 | PH2 | IR3 | PR3 | TH3 | PH3 | IR4 | PR4 | TH4 | PH4 | IR5 | PR5 | TH5 | PH5 |
|------------------------|-----|-----|-----|-----|-----|-----|-----|-----|-----|-----|-----|-----|-----|-----|-----|-----|-----|-----|-----|-----|
| Begin: So 10.06, 20:00 |     |     |     |     |     |     |     |     |     |     |     |     |     |     |     |     |     |     |     |     |
| Mon 10.06, 8:00        | 0   | 1   | 0   | 0   | 0   | 0   | 0   | 0   | 0   | 0   | 0   | 0   | 0   | 0   | 0   | 0   | 1   | 1   | 1   | 0   |
| Mon 10.06, 21:00       | 0   | 0   | 0   | 0   | 0   | 0   | 0   | 0   | 0   | 0   | 0   | 0   | 0   | 0   | 0   | 0   | 0   | 3   | 1   | 0   |
| Tue 11.06, 8:00        | 0   | 0   | 0   | 0   | 0   | 0   | 0   | 0   | 0   | 0   | 0   | 0   | 1   | 3   | 0   | 0   | 0   | 2   | 0   | 0   |
| Tue 11.06, 21:00       | 1   | 0   | 0   | 0   | 1   | 0   | 3   | 0   | 0   | 0   | 0   | 0   | 0   | 1   | 0   | 0   | 1   | 1   | 1   | 0   |
| Wed 12.06, 8:00        | 1   | 0   | 0   | 0   | 0   | 1   | 1   | 0   | 0   | 0   | 0   | 0   | 0   | 0   | 0   | 0   | 0   | 0   | 1   | 0   |
| Wed 12.06, 21:00       | 0   | 0   | 0   | 0   | 1   | 0   | 1   | 0   | 0   | 0   | 0   | 0   | 0   | 1   | 0   | 0   | 0   | 0   | 0   | 0   |
| Thr 13.06, 8:00        | 0   | 0   | 1   | 0   | 1   | 0   | 0   | 0   | 0   | 0   | 0   | 0   | 0   | 1   | 0   | 0   | 0   | 0   | 0   | 0   |
| Thr 13.06, 22:00       | 0   | 0   | 0   | 0   | 1   | 0   | 0   | 0   | 0   | 10  | 0   | 0   | 0   | 0   | 0   | 0   | 0   | 2   | 0   | 0   |
| Fri 14.06, 8:00        | 0   | 0   | 1   | 0   | 0   | 1   | 1   | 0   | 0   | 0   | 0   | 0   | 0   | 0   | 0   | 0   | 0   | 0   | 1   | 0   |
| Fri 14.06, 19:00       | 0   | 0   | 0   | 0   | 0   | 0   | 0   | 0   | 0   | 0   | 1   | 0   | 0   | 0   | 0   | 0   | 0   | 0   | 1   | 0   |
| Sat 15.06, 8:00        | 0   | 0   | 0   | 0   | 0   | 0   | 0   | 0   | 0   | 0   | 1   | 0   | 0   | 1   | 0   | 0   | 0   | 0   | 1   | 0   |
| Sat 15.06, 11:00       | 1   | 0   | 0   | 0   | 5   | 3   | 0   | 0   | 1   | 0   | 0   | 0   | 0   | 0   | 0   | 0   | 12  | 5   | 1   | 0   |
| Sat 15.06, 22:00       | 1   | 1   | 3   | 0   | 3   | 1   | 2   | 0   | 0   | 1   | 2   | 1   | 10  | 3   | 0   | 1   | 2   | 2   | 2   | 1   |
| Sun 16.06, 8:00        | 0   | 0   | 0   | 0   | 1   | 0   | 0   | 1   | 0   | 0   | 0   | 0   | 0   | 0   | 0   | 0   | 0   | 1   | 0   | 0   |
| Sun 16.06, 16:00       | 1   | 0   | 1   | 0   | 1   | 1   | 0   | 1   | 0   | 0   | 0   | 0   | 0   | 0   | 0   | 0   | 1   | 0   | 1   | 0   |
| Sun 16.06, 19:30       | 2   | 0   | 2   | 0   | 0   | 0   | 0   | 0   | 1   | 1   | 0   | 2   | 0   | 2   | 0   | 0   | 7   | 1   | 2   | 0   |
| Mon 17.06, 8:00        | 1   | 1   | 1   | 0   | 1   | 0   | 1   | 0   | 0   | 0   | 0   | 3   | 0   | 1   | 0   | 0   | 1   | 3   | 1   | 0   |
| Mon 17.06, 18:00       | 1   | 2   | 1   | 0   | 2   | 1   | 1   | 1   | 3   | 2   | 3   | 1   | 1   | 1   | 1   | 0   | 2   | 2   | 3   | 1   |
| Tue 18.06, 8:00        | 0   | 1   | 0   | 1   | 2   | 1   | 0   | 0   | 0   | 0   | 0   | 0   | 1   | 1   | 0   | 0   | 0   | 0   | 0   | 0   |
| Tue 18.06, 20:00       | 1   | 1   | 0   | 1   | 3   | 0   | 0   | 1   | 1   | 0   | 0   | 0   | 2   | 0   | 0   | 0   | 0   | 0   | 0   | 0   |
| Wed 19.06, 8:00        | 2   | 0   | 0   | 0   | 5   | 1   | 0   | 0   | 2   | 0   | 0   | 0   | 0   | 0   | 0   | 0   | 0   | 0   | 0   | 0   |
| Wed 19.06, 18:30       | 5   | 1   | 0   | 1   | 0   | 0   | 0   | 1   | 2   | 0   | 0   | 0   | 2   | 1   | 0   | 0   | 5   | 0   | 0   | 0   |

|                       |    |    |    |    |    |    |    |    |    |    |    |    |    |    |   |   |    |    |    |   |
|-----------------------|----|----|----|----|----|----|----|----|----|----|----|----|----|----|---|---|----|----|----|---|
| Thr 20.06, 8:00       | 4  | 0  | 0  | 0  | 1  | 1  | 0  | 0  | 3  | 0  | 2  | 0  | 3  | 4  | 0 | 0 | 1  | 0  | 0  | 0 |
| Thr 20.06, 20:00      | 1  | 0  | 0  | 1  | 1  | 1  | 0  | 0  | 0  | 0  | 1  | 0  | 3  | 0  | 0 | 1 | 2  | 0  | 0  | 0 |
| Fri 21.06, 8:00       | 3  | 1  | 0  | 1  | 0  | 2  | 0  | 0  | 1  | 0  | 1  | 0  | 6  | 3  | 0 | 0 | 3  | 1  | 1  | 0 |
| Fri 21.06, 21:00      | 1  | 3  | 0  | 3  | 6  | 2  | 0  | 2  | 0  | 0  | 1  | 1  | 2  | 3  | 1 | 0 | 5  | 2  | 1  | 0 |
| Sat 22.06 8:00        | 2  | 3  | 0  | 1  | 4  | 1  | 0  | 0  | 2  | 3  | 2  | 0  | 2  | 3  | 0 | 0 | 3  | 1  | 4  | 0 |
| Sat 22.06 16:00       | 2  | 3  | 0  | 2  | 7  | 1  | 0  | 2  | 2  | 3  | 2  | 2  | 5  | 4  | 0 | 1 | 3  | 0  | 1  | 0 |
| Sat 22.06 21:00       | 1  | 0  | 1  | 1  | 2  | 0  | 0  | 2  | 2  | 0  | 0  | 1  | 0  | 1  | 0 | 0 | 0  | 0  | 2  | 0 |
| Sun 23.06 8:00        | 4  | 4  | 2  | 1  | 3  | 3  | 1  | 1  | 1  | 1  | 1  | 1  | 2  | 1  | 0 | 0 | 2  | 1  | 4  | 0 |
| Sun 23.06 20:00       | 2  | 2  | 1  | 2  | 1  | 2  | 3  | 1  | 3  | 2  | 0  | 2  | 1  | 1  | 1 | 0 | 5  | 0  | 1  | 0 |
| SUM for 31 recordings | 37 | 24 | 14 | 15 | 52 | 23 | 14 | 13 | 24 | 23 | 17 | 14 | 41 | 36 | 3 | 3 | 56 | 28 | 31 | 2 |
